# Supplementary material for: Identification of molecular species of oxidized triglyceride in plasma and its distribution in lipoproteins
Source: publisher site journal article supplement (doi:10.1515/cclm-2014-1088), 2015-01-01
Supplement: Supplementary file 1 [file cclm-2014-1088_Supplementary_data.docx]

[10.1515/cclm-2014-1088](http://dx.doi.org/10.1515/cclm-2015-0067)

**Supplementary Material**

| **Supplemental Table 1**: Basic characteristics of study participants | |
| --- | --- |
|  | Mean±SD (n=9) |
| Age, years | 29.1±5.7 |
| BMI kg/m2 | 20.8±2.8 |
| Free cholesterol, mmol/L | 1.4±0.2 |
| Total cholesterol, mmol/L | 4.5±0.7 |
| LDL-cholesterol, mmol/L | 2.7±0.8 |
| HDL-cholesterol, mmol/L | 1.5±0.4 |
| Triglycerides, mmol/L | 0.8 ±0.4 |
| Phospholipids, mmol/L | 2.9±0.3 |

**Supplemental Figure 1:** Size-exclusion HPLC chromatograms of lipoproteins from (A) total lipoprotein fraction (*d*<1.225), (B) lipoprotein fraction of *d*=1.019-1.225 isolated by ultracentrifugation.
